# Supplementary material for: Time to Exhale: Additional Value of Expiratory Chest CT in Chronic Obstructive Pulmonary Disease
Source: Hindawi journal article supplement (doi:10.1155/2018/9493504), 2018-03-04
Supplement: f1 [file 9493504.f1.pdf]

***Time to exhale: additional value of expiratory chest CT in chronic obstructive pulmonary disease***

Joshua Gawlitza; Frederik Trinkmann, MD; Andreas Fischer, MD; John W. Nance, MD, Claudia Henzler, MD; Joachim Saur, MD; Ibrahim Akin, MD; Martin Borggreffe, MD; Stefan O. Schoenberg, MD; Thomas Henzler, MD for the CType investigators

**Supplemental Digital Content**

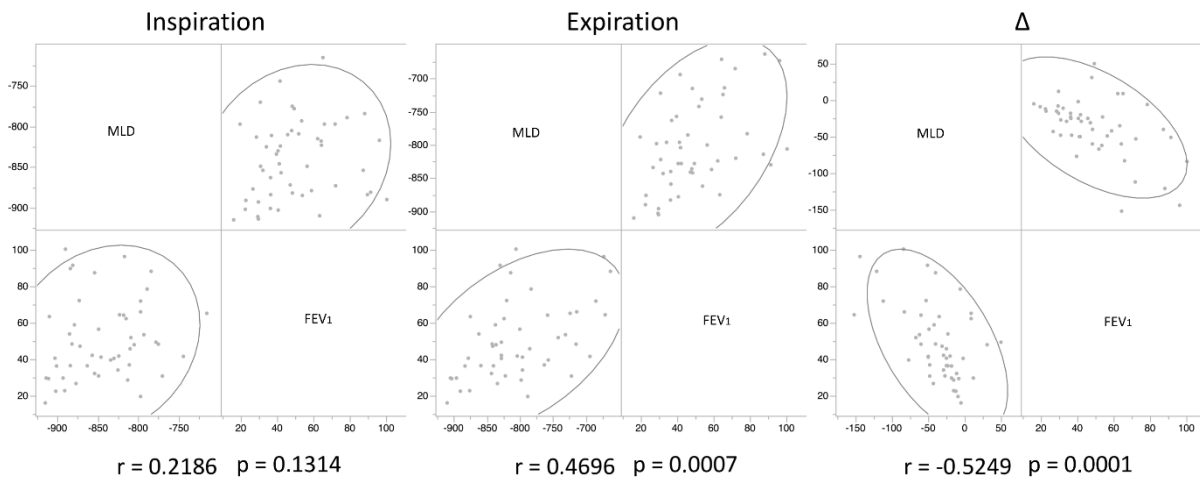

**Figure E1:** correlations of mean lung density (MLD) and forced expiratory volume in one second (FEV<sub>1</sub>) for inspiratory, expiratory and calculated delta values.

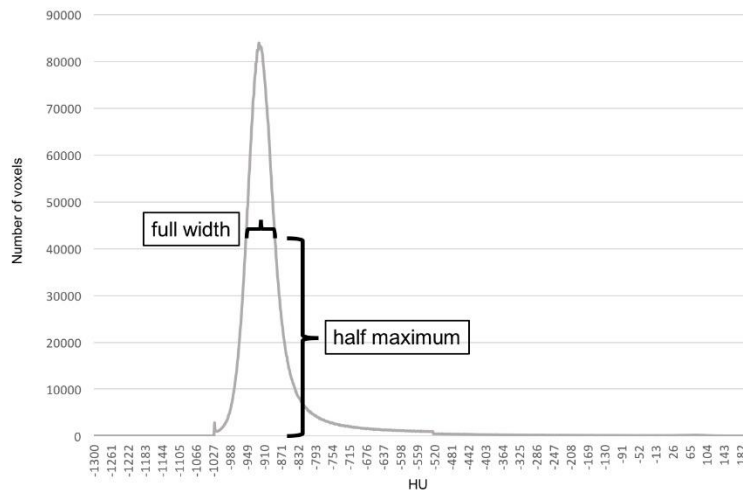

**Figure E2:** voxel-density histogram from a qCT. The number of voxels are represented on the y-axis while their HU values are on the x-axis. The full-width-half-max (FWHM) is the full width at the half maximum of this histogram.

**Table E1:** Correlation of quantified CT and lung function parameters for inspiration scan

| Quantified CT parameter | lung function parameter | Correlation | Lower 95% CI | Upper 95% CI | p-value |
|-------------------------|-------------------------|-------------|--------------|--------------|---------|
| Volume                  | VC                      | 0.0577      | -0.2272      | 0.3335       | 0.6938  |
| Volume                  | FEV <sub>1</sub>        | -0.1314     | -0.3979      | 0.1555       | 0.3681  |
| Volume                  | FEV <sub>1</sub> %VC    | -0.3605     | -0.5826      | -0.0882      | 0.0109  |
| Volume                  | RV                      | 0.3587      | 0.083        | 0.5834       | 0.0123  |
| Volume                  | TLC                     | 0.3809      | 0.1117       | 0.5981       | 0.0069  |
| Volume                  | RV%TLC                  | 0.1813      | -0.1052      | 0.4401       | 0.2125  |
| Volume                  | sR <sub>tot</sub>       | 0.102       | -0.1845      | 0.3725       | 0.4858  |
| MLD                     | VC                      | -0.0194     | -0.2989      | 0.2633       | 0.8949  |
| MLD                     | FEV <sub>1</sub>        | 0.2186      | -0.0667      | 0.4708       | 0.1314  |
| MLD                     | FEV <sub>1</sub> %VC    | 0.4856      | 0.2367       | 0.6747       | 0.0004  |
| MLD                     | RV                      | -0.4421     | -0.6452      | -0.1806      | 0.0017  |
| MLD                     | TLC                     | -0.5098     | -0.6918      | -0.2669      | 0.0002  |
| MLD                     | RV%TLC                  | -0.2924     | -0.53        | -0.0122      | 0.0415  |
| MLD                     | sR <sub>tot</sub>       | -0.3061     | -0.5408      | -0.0273      | 0.0324  |
| FWHM                    | VC                      | 0.0602      | -0.2248      | 0.3357       | 0.6811  |
| FWHM                    | FEV <sub>1</sub>        | 0.0918      | -0.1944      | 0.3636       | 0.5304  |
| FWHM                    | FEV <sub>1</sub> %VC    | 0.1818      | -0.1048      | 0.4405       | 0.2113  |
| FWHM                    | RV                      | -0.1707     | -0.4338      | 0.1192       | 0.2461  |
| FWHM                    | TLC                     | -0.1718     | -0.4321      | 0.115        | 0.238   |
| FWHM                    | RV%TLC                  | -0.0505     | -0.3271      | 0.234        | 0.7303  |
| FWHM                    | sR <sub>tot</sub>       | -0.0756     | -0.3494      | 0.2101       | 0.6057  |
| LAV                     | VC                      | -0.2261     | -0.4769      | 0.0589       | 0.1183  |
| LAV                     | FEV <sub>1</sub>        | -0.3907     | -0.6054      | -0.1231      | 0.0055  |
| LAV                     | FEV <sub>1</sub> %VC    | -0.4002     | -0.6125      | -0.1341      | 0.0044  |
| LAV                     | RV                      | 0.5293      | 0.2885       | 0.7071       | 0.0001  |
| LAV                     | TLC                     | 0.4354      | 0.1757       | 0.6384       | 0.0018  |
| LAV                     | RV%TLC                  | 0.4527      | 0.1965       | 0.651        | 0.0011  |
| LAV                     | sR <sub>to</sub>        | 0.5235      | 0.2841       | 0.7014       | 0.0001  |

**MLD:** mean lung density, **FWHM:** full width half max, **LAV:** low attenuation volume, **VC:** vital capacity, **FEV<sub>1</sub>:** forced expiratory volume in one second, **FEV<sub>1</sub>%VC:** Tiffeneau index, **RV:** residual volume, **TLC:** total lung capacity, **sR<sub>tot</sub>:** specific total airway resistance.

**Table E2:** Correlation of quantified CT and body plethysmography parameters for expiration scan

| Quantified CT parameter | lung function parameter | Correlation | Lower 95% CI | Upper 95% CI | p-value |
|-------------------------|-------------------------|-------------|--------------|--------------|---------|
| Volume                  | VC                      | -0.2367     | -0.4856      | 0.0476       | 0.1015  |
| Volume                  | FEV <sub>1</sub>        | -0.4643     | -0.6594      | -0.2106      | 0.0008  |
| Volume                  | FEV <sub>1</sub> %VC    | -0.5225     | -0.7008      | -0.2829      | 0.0001  |
| Volume                  | RV                      | 0.6466      | 0.444        | 0.7863       | <.0001  |
| Volume                  | TLC                     | 0.5503      | 0.3183       | 0.7201       | <.0001  |
| Volume                  | RV%TLC                  | 0.549       | 0.3166       | 0.7191       | <.0001  |
| Volume                  | sR <sub>tot</sub>       | 0.4345      | 0.1747       | 0.6378       | 0.0018  |
| MLD                     | VC                      | 0.1563      | -0.1307      | 0.419        | 0.2837  |
| MLD                     | FEV <sub>1</sub>        | 0.4696      | 0.217        | 0.6632       | 0.0007  |
| MLD                     | FEV <sub>1</sub> %VC    | 0.6376      | 0.4342       | 0.7791       | <.0001  |
| MLD                     | RV                      | -0.6362     | -0.7794      | -0.4297      | <.0001  |
| MLD                     | TLC                     | -0.6378     | -0.7792      | -0.4345      | <.0001  |
| MLD                     | RV%TLC                  | -0.6108     | -0.7612      | -0.3979      | <.0001  |
| MLD                     | sR <sub>to</sub>        | -0.5225     | -0.7007      | -0.2829      | 0.0001  |
| FWHM                    | VC                      | 0.2715      | -0.0105      | 0.5135       | 0.0592  |
| FWHM                    | FEV <sub>1</sub>        | 0.4228      | 0.1607       | 0.6292       | 0.0025  |
| FWHM                    | FEV <sub>1</sub> %VC    | 0.403       | 0.1374       | 0.6146       | 0.0041  |
| FWHM                    | RV                      | -0.416      | -0.6261      | -0.1495      | 0.0033  |
| FWHM                    | TLC                     | -0.3402     | -0.5672      | -0.0653      | 0.0168  |
| FWHM                    | RV%TLC                  | -0.4579     | -0.6548      | -0.2029      | 0.0009  |
| FWHM                    | sR <sub>tot</sub>       | -0.3345     | -0.5628      | -0.0589      | 0.0188  |
| LAV                     | VC                      | -0.346      | -0.5716      | -0.0718      | 0.0149  |
| LAV                     | FEV <sub>1</sub>        | -0.4465     | -0.6465      | -0.189       | 0.0013  |
| LAV                     | FEV <sub>1</sub> %VC    | -0.336      | -0.5639      | -0.0605      | 0.0183  |
| LAV                     | RV                      | 0.5748      | 0.3474       | 0.7383       | <.0001  |
| LAV                     | TLC                     | 0.405       | 0.1397       | 0.616        | 0.0039  |
| LAV                     | RV%TLC                  | 0.5015      | 0.2564       | 0.6859       | 0.0002  |
| LAV                     | sR <sub>tot</sub>       | 0.5602      | 0.3312       | 0.7269       | <.0001  |

**MLD:** mean lung density, **FWHM:** full width half max, **LAV:** low attenuation volume, **VC:** vital capacity, **FEV<sub>1</sub>:** forced expiratory volume in one second, **FEV<sub>1</sub>%VC:** Tiffeneau index, **RV:** residual volume, **TLC:** total lung capacity, **sR<sub>tot</sub>:** specific total airway resistance.

**Table E3:** Correlation of quantified CT and body plethysmography parameters for delta values

| Quantified CT parameter | lung function parameter | Correlation | Lower 95% CI | Upper 95% CI | p-value |
|-------------------------|-------------------------|-------------|--------------|--------------|---------|
| Volume                  | VC                      | 0.4261      | 0.1646       | 0.6316       | 0.0023  |
| Volume                  | FEV <sub>1</sub>        | 0.4466      | 0.1892       | 0.6466       | 0.0013  |
| Volume                  | FEV <sub>1</sub> %VC    | 0.1645      | -0.1223      | 0.426        | 0.2585  |
| Volume                  | RV                      | -0.3411     | -0.57        | -0.0631      | 0.0177  |
| Volume                  | TLC                     | -0.1712     | -0.4316      | 0.1156       | 0.2396  |
| Volume                  | RV%TLC                  | -0.4868     | -0.6755      | -0.2382      | 0.0004  |
| Volume                  | sR <sub>tot</sub>       | -0.4515     | -0.6501      | -0.195       | 0.0011  |
| MLD                     | VC                      | -0.2875     | -0.5262      | -0.0068      | 0.0452  |
| MLD                     | FEV <sub>1</sub>        | -0.5249     | -0.7024      | -0.2859      | 0.0001  |
| MLD                     | FEV <sub>1</sub> %VC    | -0.4814     | -0.6717      | -0.2315      | 0.0005  |
| MLD                     | RV                      | 0.5291      | 0.2883       | 0.7069       | 0.0001  |
| MLD                     | TLC                     | 0.452       | 0.1957       | 0.6505       | 0.0011  |
| MLD                     | RV%TLC                  | 0.6728      | 0.483        | 0.8022       | <.0001  |
| MLD                     | sR <sub>tot</sub>       | 0.507       | 0.2634       | 0.6899       | 0.0002  |
| FWHM                    | VC                      | -0.3059     | -0.5406      | -0.0271      | 0.0325  |
| FWHM                    | FEV <sub>1</sub>        | -0.4784     | -0.6695      | -0.2278      | 0.0005  |
| FWHM                    | FEV <sub>1</sub> %VC    | -0.3613     | -0.5832      | -0.0891      | 0.0108  |
| FWHM                    | RV                      | 0.3873      | 0.1159       | 0.6049       | 0.0065  |
| FWHM                    | TLC                     | 0.2866      | 0.0058       | 0.5254       | 0.0459  |
| FWHM                    | RV%TLC                  | 0.5673      | 0.3404       | 0.7318       | <.0001  |
| FWHM                    | sR <sub>tot</sub>       | 0.3756      | 0.1055       | 0.594        | 0.0078  |
| LAV                     | VC                      | 0.3788      | 0.1093       | 0.5965       | 0.0073  |
| LAV                     | FEV <sub>1</sub>        | 0.1079      | -0.1787      | 0.3776       | 0.4606  |
| LAV                     | FEV <sub>1</sub> %VC    | -0.327      | -0.557       | -0.0505      | 0.0218  |
| LAV                     | RV                      | -0.0366     | -0.3174      | 0.2501       | 0.8049  |
| LAV                     | TLC                     | 0.2137      | -0.0718      | 0.4669       | 0.1404  |
| LAV                     | RV%TLC                  | -0.068      | -0.3427      | 0.2173       | 0.6423  |
| LAV                     | sR <sub>tot</sub>       | -0.0077     | -0.2883      | 0.2741       | 0.958   |

**MLD:** mean lung density, **FWHM:** full width half max, **LAV:** low attenuation volume, **VC:** vital capacity, **FEV<sub>1</sub>:** forced expiratory volume in one second, **FEV<sub>1</sub>%VC:** Tiffeneau index, **RV:** residual volume, **TLC:** total lung capacity, **sR<sub>tot</sub>:** specific total airway resistance.
